# Supplementary material for: Bacterial Contamination of Antiseptics, Disinfectants, and Hand Hygiene Products Used in Healthcare Settings in Low- and Middle-Income Countries—A Systematic Review
Source: MDPI journal article supplement (doi:10.3390/hygiene3020010), 2023-04-13
Supplement: s1 [file s1]

Archive with 7 entries (7 files):
- Supplementary Document S1.pdf
- Supplementary Table S1.pdf
- Supplementary Table S2.pdf
- Supplementary Table S3.pdf
- Supplementary Table S4.pdf
- Supplementary Table S5.pdf
- SupplementaryDocument S2.xlsx
