# Supplementary material for: Bacterial Contamination of Antiseptics, Disinfectants, and Hand Hygiene Products Used in Healthcare Settings in Low- and Middle-Income Countries—A Systematic Review
Source: MDPI journal article supplement (doi:10.3390/hygiene3020010), 2023-04-13
Supplement: s1 [file s1 › Supplementary Table S1.pdf]

**Supplementary Table S1. Method used to appraise risk of bias and quality of methods and reporting of the (pseudo-)outbreaks and cross-sectional surveys related to contaminated antiseptics, disinfectants and hand hygiene products used in healthcare facilities in low- and middle-income countries.**

| Item scored                                                                                     | Used for                                            | Green score: good                                                                                                                                                                                                                                                                                       | Yellow score: satisfactory                                                                                                                                                                                                  | Red score: poor                                                                                                                                                                                                             |
|-------------------------------------------------------------------------------------------------|-----------------------------------------------------|---------------------------------------------------------------------------------------------------------------------------------------------------------------------------------------------------------------------------------------------------------------------------------------------------------|-----------------------------------------------------------------------------------------------------------------------------------------------------------------------------------------------------------------------------|-----------------------------------------------------------------------------------------------------------------------------------------------------------------------------------------------------------------------------|
| <b>Healthcare setting was well described</b>                                                    | <b>(Pseudo-)outbreak<br/>Cross-sectional survey</b> | Hospital and centers of the survey are well described - hospital level and wards, type of centers (public - private...)                                                                                                                                                                                 | Hospital and centers of the survey only briefly described and/or reported                                                                                                                                                   | Hospital and centers surveyed not described                                                                                                                                                                                 |
| <b>Title and Abstract provided the information about "outbreak" or "cross-sectional survey"</b> | <b>(Pseudo-)outbreak<br/>Cross-sectional survey</b> | Title AND Abstract mentions that the article is about an outbreak report or cross-sectional survey (equivalent terms accepted)                                                                                                                                                                          | Only Abstract mentions that the article is about an outbreak report or cross-sectional survey                                                                                                                               | Neither Title nor Abstract mention that the article is about an outbreak report or cross-sectional survey                                                                                                                   |
| <b>The outbreak setting was well described</b>                                                  | <b>(Pseudo-)outbreak</b>                            | Outbreak setting is well described: hospital level, ward, numbers of beds, numbers of admission, IPC levels and team                                                                                                                                                                                    | Outbreak setting is briefly/partly described: hospital level, ward, numbers of beds, numbers of admission, IPC levels and team                                                                                              | Outbreak setting is not described except for information about ward                                                                                                                                                         |
| <b>The (pseudo-)outbreak was well described</b>                                                 | <b>(Pseudo-)outbreak</b>                            | Outbreak description is well detailed and includes relevant items such as type of alert, patients affected (numbers, age/gender), infected body sites, infection versus colonization, case-fatalities, duration, risk factors or interventions, specific observations or clues to the (potential) cause | Outbreak description is partly described but includes the minimal information such as patients affected (numbers, age/gender), infected body sites                                                                          | Outbreak description is minimal and does not contain key data about patients infected and infected body sites                                                                                                               |
| <b>Outbreak index organism - microbiological methods were described in sufficient detail</b>    | <b>(Pseudo-)outbreak</b>                            | Sufficient microbiological data are provided about the index organism causing the (pseudo-)outbreak: specimen submitted, culture, identification and antibiotic susceptibility testing (results and methods).                                                                                           | Basic microbiological data are provided about the index organism causing the (pseudo-)outbreak: specimen submitted, culture, identification and antibiotic susceptibility testing (results and methods).                    | Only the names of the index organism causing the (pseudo-)outbreak is reported specimen submitted, culture, identification and antibiotic susceptibility testing (results and methods).                                     |
| <b>The outbreak investigation included a clinical epidemic investigation</b>                    | <b>(Pseudo-)outbreak</b>                            | Clinical-epidemic investigation done: case-control, retrospective cohort or prospective, case-definition made, timeline made, traced upstream to pharmacy and product as procured, root cause analysis, specific trigger...                                                                             | Clinical-epidemic investigation done: case-control, retrospective cohort or prospective, case-definition made, timeline made, traced upstream to pharmacy and product as procured, root cause analysis, specific trigger... | Clinical-epidemic investigation done: case-control, retrospective cohort or prospective, case-definition made, timeline made, traced upstream to pharmacy and product as procured, root cause analysis, specific trigger... |

|                                                                                                                                                                                     |                                                     |                                                                                                                                                     |                                                                                                                                                                                                          |                                                                                                                                                                                   |
|-------------------------------------------------------------------------------------------------------------------------------------------------------------------------------------|-----------------------------------------------------|-----------------------------------------------------------------------------------------------------------------------------------------------------|----------------------------------------------------------------------------------------------------------------------------------------------------------------------------------------------------------|-----------------------------------------------------------------------------------------------------------------------------------------------------------------------------------|
| <b>The outbreak environmental investigation was oriented by the clinical epidemic investigation</b>                                                                                 | <b>(Pseudo-)outbreak</b>                            | Outbreak environmental investigation oriented by clinical-epidemic investigation                                                                    | No epidemic investigation done - environmental investigation oriented by the nature of the index organisms and/or clinical observations ( <i>e.g.</i> , association with intravascular catheters)        | Broad environmental screening done without clear orientation                                                                                                                      |
| <b>Product and active ingredient were provided</b>                                                                                                                                  | <b>(Pseudo-)outbreak<br/>Cross-sectional survey</b> | Product(s) well identified by generic name or active ingredient, formulation and concentration                                                      | Formulation or concentration of (part of the) product(s) not mentioned.                                                                                                                                  | (Some) product(s) not well identified <i>e.g.</i> , only brand name or user-name provided. A minus for those articles in which an equivocal generic name not retrievable          |
| <b>The use/application of the product(s) was well described</b>                                                                                                                     | <b>(Pseudo-)outbreak<br/>Cross-sectional survey</b> | Use of product well described ( <i>e.g.</i> , skin antisepsis, disinfection of instruments, hand hygiene)                                           | Use of product described but multiple applications mentioned ( <i>e.g.</i> , hand hygiene and antiseptic) with not enough detail to understand which application contributed (most) to the transmission. | Use of product not described                                                                                                                                                      |
| <b>A correct terminology was used (antiseptics, disinfectants, hand hygiene products)<br/>In cross-sectional surveys, sample selection and numbers (denominators) were provided</b> | <b>(Pseudo-)outbreak<br/>Cross-sectional survey</b> | Terminology of products (antiseptics, disinfectant, alcohol-based hand rub and liquid/soap) was appropriate (in line with product identity and use) | Terminology of products was not appropriate ( <i>e.g.</i> , "disinfectant" used for liquid soap products)                                                                                                | Terminology of products was not appropriate and was also inconsistent across the article ( <i>e.g.</i> , interchangeable use of "antiseptic" and "disinfectant")                  |
| <b>In cross-sectional surveys, sufficiently large sample sizes were provided</b>                                                                                                    | <b>Cross-sectional survey</b>                       | Sample selection systematically, well described, denominator provided.                                                                              | Sample selection at random, no denominator provided                                                                                                                                                      | Sample selection criteria and denominator not provided                                                                                                                            |
| <b>In cross-sectional surveys, sufficiently large sample sizes were provided</b>                                                                                                    | <b>Cross-sectional survey</b>                       | Large sample sizes allowing comparisons between product types, formulations and hospital levels                                                     | Sample sizes sufficiently large to support conclusions about comparisons between product f( <i>e.g.</i> liquid versus bar soap) and concentrations.                                                      | Sample sizes low (< 10 samples/product) or not supporting conclusions                                                                                                             |
| <b>Microbiological culture methods used were appropriate</b>                                                                                                                        | <b>(Pseudo-)outbreak<br/>Cross-sectional survey</b> | Use of Neutralizer AND Kelsey-and-Maurer (including modified) AND appropriate culture media – a Plus in case of appropriate colony counts           | No neutralizer used, Kelsey-and-Maurer (including modified) AND appropriate culture media used                                                                                                           | No information about culture OR only filtration/enrichment or not clear whether results were obtained by only filtration/enrichment versus by direct plating or Kelsey-and-Maurer |
| <b>Antibiotic susceptibility testing methods were appropriate</b>                                                                                                                   | <b>(Pseudo-)outbreak<br/>Cross-sectional survey</b> | Antibiotic susceptibility testing correctly described (methods with interpretative standard, correct panel of antibiotics used) and reported        | Incomplete description or reporting of antibiotic susceptibility testing                                                                                                                                 | Major errors in antibiotic susceptibility testing methods or reporting ( <i>e.g.</i> , incorrect results, inconsistent results, incorrect presentation)                           |

|                                                                                                               |                                                     |                                                                                                                                                                          |                                                                                                                                                                 |                                                                                                                                               |
|---------------------------------------------------------------------------------------------------------------|-----------------------------------------------------|--------------------------------------------------------------------------------------------------------------------------------------------------------------------------|-----------------------------------------------------------------------------------------------------------------------------------------------------------------|-----------------------------------------------------------------------------------------------------------------------------------------------|
| <b>Additional investigations were done and well reported (interview, questionnaire, review of procedures)</b> | <b>(Pseudo-)outbreak<br/>Cross-sectional survey</b> | Questionnaire, interview with staff, observations, review of procedures done and well described and reported                                                             | Questionnaire, interview with staff, observations, review of procedures done briefly described and/or partly reported                                           | No root cause analysis done                                                                                                                   |
| <b>Microbiological typing methods used were appropriate</b>                                                   | <b>(Pseudo-)outbreak</b>                            | Enough representative isolates used, duplicate isolates removed, typing beyond identification and antibiotic susceptibility testing done                                 | Low numbers of representative isolates OR no description about isolate selection OR typing comprising only identification and antibiotic susceptibility testing | Low numbers, proportions and representativity ( <i>e.g.</i> , timeline, specimen) of either clinical or environmental isolates                |
| <b>Reporting of Results was complete and appropriate</b>                                                      | <b>(Pseudo-)outbreak<br/>Cross-sectional survey</b> | Results reported consistently with the Methods section and with appropriate details and denominators                                                                     | Results incompletely reported - <i>e.g.</i> , denominators or culture results of other fomites reported, aggregating of specimens                               | Part of the Methods not reported in the Results section ( <i>e.g.</i> , results of antibiotic susceptibility testing)                         |
| <b>Risk factors were assessed</b>                                                                             | <b>(Pseudo-)outbreak</b>                            | Risk factors assumed and observed (by culture, interview, observation)                                                                                                   | Risk factors only assumed                                                                                                                                       | Risk factors not discussed                                                                                                                    |
| <b>Evidence for Reservoir was assessed</b>                                                                    | <b>(Pseudo-)outbreak</b>                            | Evidence for reservoir considered and discussed in light of the evidence provided ( <i>e.g.</i> , association in time, exclusivity of culture result, molecular typing.) | Evidence for reservoir considered                                                                                                                               | Product considered as the reservoir of the outbreak but incomplete evidence provided ( <i>e.g.</i> , culture only from enrichment cultures)   |
| <b>Evidence for Transmission was assessed</b>                                                                 | <b>(Pseudo-)outbreak</b>                            | Transmission from product to patient hypothesized/discussed AND assessed by culture (instruments) and/or observation/interview                                           | Transmission from product to patient hypothesized/discussed but not further assessed                                                                            | Transmission from product to patient not considered                                                                                           |
| <b>Evidence for Root cause was assessed</b>                                                                   | <b>(Pseudo-)outbreak</b>                            | Root cause (primary source of contamination) hypothesized/discussed and assessed by culture (water, sealed product) AND observation/interview                            | Root cause (primary source of contamination) hypothesized/discussed and assessed by culture (water, sealed product) AND observation/interview                   | Root cause (primary source of contamination) hypothesized/discussed and assessed by culture (water, sealed product) AND observation/interview |
