# Supplementary material for: Bacterial Contamination of Antiseptics, Disinfectants, and Hand Hygiene Products Used in Healthcare Settings in Low- and Middle-Income Countries—A Systematic Review
Source: MDPI journal article supplement (doi:10.3390/hygiene3020010), 2023-04-13
Supplement: s1 [file s1 › Supplementary Table S5.pdf]

**Supplementary Table S5. Other results: Articles demonstrating bacterial contamination of antiseptics, disinfectants and hand hygiene products but with another fomite identified as the actual reservoir and source of infection; articles describing outbreaks related to contaminated eosin (considered and used as an antiseptic).** Country income level is based on the data from the World Bank (World Bank2022) at the year of publication. Product names are listed as mentioned in the referred articles; in case of brand names or jargon, the generic name is written in brackets and italics. Bacterial names are listed as mentioned in the referred articles, names according to actual nomenclature (*List of Prokaryotic names with Standing in Nomenclature* and updated species names were used (LPSN, 2022b)) are written between brackets and used in the “Summary/Comment”. Abbreviations: AST = antibiotic susceptibility testing, CHG = chlorhexidine gluconate, CFU/ml = colony forming units/ml, ID = Identification, LIC = low-income country, MIC = middle income country.

| Author – Year<br>Country (income level)<br>Setting                                 | Outbreak: description, potential reservoir and transmission, interventions                                                                                                                                                                                                                                                                                                                                                                                                                                                                                                                                                                                                                                                                                                                                                                                                                                                                                                                                                                                                                                                                                                    | Microbiology methods<br>Summary/Comment                                                                                                                                                                                                                                                                                                                                                                                                                                                                                                                                                   |
|------------------------------------------------------------------------------------|-------------------------------------------------------------------------------------------------------------------------------------------------------------------------------------------------------------------------------------------------------------------------------------------------------------------------------------------------------------------------------------------------------------------------------------------------------------------------------------------------------------------------------------------------------------------------------------------------------------------------------------------------------------------------------------------------------------------------------------------------------------------------------------------------------------------------------------------------------------------------------------------------------------------------------------------------------------------------------------------------------------------------------------------------------------------------------------------------------------------------------------------------------------------------------|-------------------------------------------------------------------------------------------------------------------------------------------------------------------------------------------------------------------------------------------------------------------------------------------------------------------------------------------------------------------------------------------------------------------------------------------------------------------------------------------------------------------------------------------------------------------------------------------|
| Pinna 2009<br>India (MIC)<br>Secondary hospital                                    | <p><u>Description:</u> <i>Pseudomonas aeruginosa</i> endophthalmitis after cataract surgery, 20 patients in 40 days</p> <p><u>Investigation:</u> Environmental cultures: phacoemulsifier (machine inserted in the lens that emulsifies the cataract), povidone-iodine solution (used as preoperative antiseptics), irrigating solution, operating room air-conditioning system.</p> <p><u>Reservoir:</u> Growth of <i>P. aeruginosa</i> from air-conditioning system, povidone-iodine solution and phacoemulsifier</p> <p><u>Transmission:</u> Hypothesized: air conditioner’s condensate (droplets) or airborne</p> <p><u>Relatedness environmental – clinical isolates:</u> enterobacterial repetitive intergenic consensus-polymerase chain reaction: similarity of clinical isolates with isolates from the air conditioning but not with isolates from phacoemulsifier and povidone-iodine solution.</p> <p><u>Intervention:</u> Closure of all operation rooms, intensive cleaning and fumigation with high concentration of formalin performed twice a week, cleaning and reconditioning of the air-conditioning system, and changing of the phacoemulsifier tubes</p> | <p>Methods of sample processing not described<br/>AST: disk diffusion, guidelines not mentioned<br/>Resistant to cefazolin, fluoroquinolones<br/>chloramphenicol, tetracycline, aminoglycosides</p> <p><i>Pseudomonas aeruginosa</i> endophthalmitis after cataract surgery traced to the air conditioning system.<br/><b>Povidone-iodine</b> (and the phacoemulsifier) was also contaminated with <i>P. aeruginosa</i> but it was unrelated to the causative bacterium.</p>                                                                                                              |
| Pegues 1994<br>Guatemala (MIC)<br>Tertiary hospital                                | <p><u>Description:</u> 26 cases of bloodstream infections in a neonatal intensive care unit, 23 neonates died, isolates included <i>Serratia marcescens</i>, <i>Klebsiella pneumoniae</i> and <i>Klebsiella oxytoca</i></p> <p><u>Investigation:</u> epidemiological study (cohort study, review of patient files), environmental investigation and procedure review.</p> <p><u>Reservoir:</u> <i>Achromobacter xylosoxidans</i>, different from the epidemic species, was isolated in 4% chlorhexidine gluconate in concentration of 8 10<sup>6</sup> CFU/ml. <i>K. pneumoniae</i> was isolated from neonate rectal swabs and human breast milk, and <i>S. marcescens</i> from post-handwashing samples of healthcare workers. Other risk factors were (i) failure of the chlorination of the tap water system and (ii) administration of intravenous medications</p> <p><u>Relatedness CHG – clinical isolates:</u> no identical bacterial species</p>                                                                                                                                                                                                                      | <p>Culture; Plating on blood and MacConkey agar<br/>Incubation at 35°C for 5 days<br/>ID: triple-sugar iron agar (<i>note: conventional phenotypic tests</i>)<br/>No AST</p> <p>Finding of heavy <b><i>Achromobacter xylosoxidans</i></b> contamination of <b>chlorhexidine gluconate solution used for handwashing</b>, but unrelated to the outbreak of bloodstream infections in a Neonatal Intensive Care Unit</p>                                                                                                                                                                    |
| Salem 1998<br>Boukadida1993<br>Boukadida1999<br>Tunisia (MIC)<br>Tertiary hospital | <p><u>Description:</u> 2 cases (not clustered) of <i>Alcaligenes xylosoxidans</i> (<i>Achromobacter xylosoxidans</i>) bloodstream infection and meningitis in neonates (one low-birth weight and one premature), one died. Neonates had dermatitis and omphalitis respectively to which eosin was applied.</p> <p><u>Investigation:</u> environmental investigation (eosin, antiseptics and IV-fluids)</p> <p><u>Reservoir:</u> water-based eosin solution <sup>a</sup> 2% contaminated with <i>Alcaligenes xylosoxidans</i> (&gt; 10<sup>6</sup> CFU/ml), saline and antiseptics yielded no growth</p> <p><u>Relatedness eosin - clinical isolates:</u> phenotypic identification and Pulse-Field Gel Electrophoresis</p>                                                                                                                                                                                                                                                                                                                                                                                                                                                    | <p>Methods of sample processing not described<br/>AST: methods not specified<br/>ID: API 20NE bioMérieux<br/>AST: susceptible to trimethoprim-sulfamethoxazole, piperacillin, ticarcillin and imipenem, resistant to cefotaxime, gentamicin and amikacin</p> <p><b><i>Alcaligenes xylosoxidans</i></b> bloodstream infection and meningitis caused by contaminated <b>water-based eosin 2%</b> applied on skin lesions in neonates. Culture of antiseptics did not grow. (<i>Note: References Salem1998, Boukadida1993 and Boukadida1999 probably describe the same case report</i>).</p> |

<sup>a</sup> Eosin is not considered as antiseptic (McDonnell2017)
