# Supplementary material for: Bacterial Contamination of Antiseptics, Disinfectants, and Hand Hygiene Products Used in Healthcare Settings in Low- and Middle-Income Countries—A Systematic Review
Source: MDPI journal article supplement (doi:10.3390/hygiene3020010), 2023-04-13
Supplement: s1 [file s1 › SupplementaryDocument S2.xlsx]

## Sheet: Data Extraction
Author	Year of publication	Decades	Country	UN geoscheme	(Pseudo)Outbreak Cross-sectional	Systematic Review : article included in data extraction Yes/No	HIC/UMIC/LMIC/LIC (Current classification)	LMIC at year of publication (closest year)	Article title	Tested Product(s)	Number of tested products	Group of product	Antimicrobial concentration in the products	Product formulation Alcohol-based/Aqueous	Product type (author's terminology) Antiseptic/Disinfectant/Hand hygiene/Preservative/Environmental cleaning	Actual use of the product in the study	Level of the hospital	Urban/Rural	Patient's risk factors	Duration of epidemic	Other Environmental samples	Type of other environmental samples	Case definition Yes/No	Case-control/cohort	Colonization/Carriage	Patient/ward	Type of study Prospective/Retrospective/Review/Editorial	Type of publication Original/Review/Editorial/Guidelines	Sampling techniques	Use of neutralizer (Yes/No)	Culture methods	Methods category	Duplicate agar	Antiseptic, disinfectant, and hand hygiene product culture result	Product showing bacterial growth	Number of sample collected	Proportion of contamination of sampled products	Identification method	Bacterial species identification	Colony count techniques	Colony count result	AST methods	Guideline mentioned	Antimicrobial susceptibility profile	Contamination linked to infection: Bacteria isolated Identical species/Reistance/Genotype/No identical species isolated/Not investigated	Contamination linked to (pseudo-)infection Proven/Suspected/Not clear/No/Not investigated/Not applicable	Details on the contamination linked to infection	Clinical sample in whitch the contaminating bacteria were isolated Blood/Urine/CSF/Wound/Others	Clinical outcome (if applicable) Infection type/Not applicable
Khor	1977	1970s	Malaysia	Southeastern Asia	Cross-sectional	Yes	UMIC	LMIC	In-use testing of disinfectants in Malaysian government hospitals	Dettol (chloroxylenol) Hibitane (CHG)	2	Phenol CHG	Dettol 1/10 Dettol 1/20 Dettol (no concentration mentioned) Hibitane 1/200 Hibitane 1/2000	Aqueous	Disinfectant	Soaking thermometeres and forceps	No data	No data	Not applicable	Not applicable	Yes	Water	Not applicable	Not applicable	Not applicable	No data	Prospective	Original	Disinfectants in discard jars or bowls	Yes (Tween 80)	In-use test of Kelsey and Maurer	In-use test of Kelsey and Maurer	No	Positive	Dettol Hibitane	67	Hospiital A (Dettol thermometer = 2/8, Dettol forceps = 2/8) Hospital B (Dettol 1/20 thermometer = 3/10 Dettol 1/10 forceps = 3/10, Dettol 1/20 trolley = 3/10) Hospital C (Dettol forceps = 6/32, Dettol thermometer = 6/32, Dettol troley mop = 6/32, Hibitane 1200 thermometer = 6/32, Hibitane 1/200 cheatle forcep = 6/32, Hibitane 1/2000 trolley mop = 6/32) Hospital D (Dettol Cheatle forcep = 5/17, D…	Conventional methods	Moraxella spp. Flavobacterium spp. Pseudomonas spp.	Modified in-use test of Kelsey and Maurer (Sample showing more than 6 colonies from the 10 drops, i.e. more than 250 UFC/ml considered contaminated)	Dettol 1/10, 1/20 and no info: 8 x 10 exp3 to > 10 exp5 Hibitane 1/200 and 1/2000: > 10 exp5	Not applicable	Not applicable	Not applicable	Not applicable	Not applicable	Not applicable	Not applicable	Not applicable
Thong	1981	1980s	Malaysia	Southeastern Asia	Outbreak	Yes	UMIC	LMIC	Flavobacterium meningosepticum infection: an epidemiological study in a newborn nursery	Chlorhexidine	1	CHG	(0.05%, 0.5%, 1%)	Aqueous	Antiseptic and Disinfectant	Skin disinfection Suction apparatu disinfection	Tertiary	Urban	Prematurity	6 years	Yes	Surfaces Equipment Tap water Air Carrier (throat, sputum, vaginal)	No	No data	Staff carriage Neonate colonization	Neonates	Prospective and Retrospective	Original	Not detailed	No	Blood agar McConkey, Modified Thayer Martin medium Incubation time and conditions not specified No neutralizer In-use test of Kelsey and Maurer	In-use test of Kelsey and Maurer	No data	Positive	CHG	19	63% (12/19)	Kliger iron agar Suspected colonies (non-fermenters) identified by methods of Cowan and Steel Serotype by rapid slide agglutination test using absorbed rabbit anti-Flavobacterium meningosepticum sera	Flavobacterium meningospticum	No data	Not applicable	No data	Not applicable	Not applicable	Identical species	Suspected	Conventional methods an serotyping (No molecular test was done to ascertain the relatedness)	CSF	Meningitis
Anyiwo	1982	1980s	Nigeria	Western Africa	Outbreak	Yes	LMIC	LIC	Pseudomonas aeruginosa in postoperative wounds from chlorhexidine solutions	Chlorhexidine	1	CHG	1/2000	Aqueous	Antiseptic	No data	Tertiary	Urban	No data	1 month	Yes	Tap water	No	No data	No investigation about colonization or carriage	Surgical, post-natal and pediatric	Prospective	Original	Sampling techniques not described (samples from diluted chlorhexidine, undiluted chlorhexidine and tap water)	No	Plating the samples on Blood agar and nutrient agar Incubation aerobically overnight at 37°C	Direct plating	No	Positive	CHG	No data	No data	Colony appearance, Gram staining result and biochemical reactions	Pseudomonas aeruginosa	No data	Not applicable	No data	Not applicable	Not applicable	Identical species	Suspected	Conventional methods (No molecular test was done to ascertain the relatedness)	Wound swabs	Wound infection
Cisse	1987	1980s	Senegal	Western Africa	Outbreak	Yes	LMIC	LMIC	A propos d'une transmission nosocomiale d'Enterobacter cloacae dans un hôpital d'enfants en zone tropicale	Dakin	1	Chlorine	Not specified	Aqueous	Antiseptic	Catheters disinfection in the antiseptic (Dakin)	Tertiary	Urban	No data	2 months	Yes	Normal saline	No	No data	No investigation about colonization or carriage	Pediatric emergency	Prospective	Original	Not described	No data	No data	No data	Not applicable	Positive	Dakin	1	1/1	No data	Enterobacter cloacae	No data	Not applicable	No data	Not applicable	Sensitive to cefotaxime, amikacine and colimycine Intermediate to gentamicine, kanamycin and tobramycin Resistant to ampicillin, amoxicillin, carbanicillin, cephalotine, chloramphenicol, doxycycline, trimethoprime-sulfamethoxazole	Identical species	Suspected	No moleculare test was done to ascertain the relatedness	Blood, pus and catheter	Bacteremia and wound infection
Olayemi	1994	1990s	Nigeria	Western Africa	Cross-sectional	Yes	LMIC	LIC	Contaminated Disinfectants in Health Clinic in Ilorin, Nigeria	Phenolic compound (Dettol and trichlorophenol-TCP) Alcohol Biguanide (chlorhexidine) QACs Potassium permenganate	5	Phenol Alcohol CHG QUAT	Not specified	Aqueous and alcohol-based	Disinfectant	No data	Tertiary	Urban	Not applicable	Not applicable	Not applicable	Not applicable	Not applicable	Not applicable	Not applicable	University hospital Three urban hospitals	Prospective	Original	Not described	No	The modified in-use test method of Kelsey and Maurer Nutrient agar No detail on incubation conditions and time	In-use test of Kelsey and Maurer	No data	Positive	Eusol (chlorine) Ammonium potassium iodine Methylaed spirit (ethanol) Tincture benzoate Potassium permanganate	18	5/18	No data	Pseudomonas aeruginosa and Bacillus spp. in Eusol, ammonium potassium iodine, and alcohol Pseudomonas aeruginosa in tincture benzoate Staphylococcus aureus in Eusola E. coli in potassium permanganate	No data	Not applicable	No data	Not applicable	Not applicable	Not investigated	Not investigated	Not applicable	Not applicable	Not applicable
Danchaivijitr	1995	1990s	Thailand	Southeastern Asia	Cross-sectional	Yes	UMIC	LMIC	Contamination of mercurochrome and chlorhexidine-cetrimide in a teaching hospital	Acriflavine Alcohol Chlorhexidine-cetrimide Hydrogen peroxide Hypochlorite Iodophor Iodine-tincture Mercurochrome Methimasol	9	Alcohol CHG-QUAT H2O2 Iodine	Not specified	Aqueous and alcohol-based	Antiseptic	Antisepsis	Tertiary	Urban	Not applicable	Not applicable	Not applicable	Not applicable	Not applicable	Not applicable	Not applicable	Medicine, Surgery, Obstetrics-gynecology, Pediatrics, Out-patients, Private, Ophthalmology, Radiology, and Pharmacy	Prospective	Original	Antiseptics were randomly collected by drawing No more detail on the sampling techniques	Yes (type not specified)	Standard methods using adequate neutralizer for each antseptic No more detail (culture media, incubation)	No data	No data	Positive	Mercurochrome Chlorhexidine-cetrimide	Mercurochrome = 47 Chlorhexidine-cetrimide = 54	Mercurochrome: 26/47 Chlorhexidine-cetrimide: 6/54	Standard methods	Gram-negative bacilli Acinetobacter anitratus Gram-positive bacilli	No data	Not applicable	No data	Not applicable	Not applicable	Not investigated	Not investigated	Not applicable	Not applicable	Not applicable
Kajanahareutai	1995	1990s	Thailand	Southeastern Asia	Cross-sectional	Yes	UMIC	LMIC	Efficacy and Contamination of In-Use Disinfectants in Rajavithi General Hospital	Chlorhexidine/cetrimide QAC Phenolic Hypochorite	4	CHG-QUAT QUAT Phenol Chlorine	Chlorhexidine 1:100 QAC 1:500 and 1:100 Phenolic 2% Hypochlorite 0.05% and 1%	Aqueous	Disinfectant	Devices and consummables disinfection	Secondary	Urban	Not applicable	Not applicable	Not applicable	Not applicable	Not applicable	Not applicable	Not applicable	Operation, labour and surgical intensive care rooms	Prospective	Original	20 ml of the liquid was collected using sterile pipette in a sterile bottle in the afternoon	Yes, 3% Tween 80	Dilution of 1 ml in 9 ml of Nutrient broth + neutralizer (Tween 80 at 3%) Inoculation of 10 drops of diluted disinfectant on 2 Nutrient agar plates for each sample ("in-use test") Incubation of 1 plate at 35°C for 3 days and the other at room temperature for 7 days	In-use test of Kelsey and Maurer	Yes	Positive	Chlorhexidine/cetrimide 1/100 Phenolic 2% Hypochlorite 0.05% and 1%	Chlorhexidine/cetrimide 1/100 = 126 QAC 1:500 = 6 QAC 1:100 = 40 Phenolic 2% = 34 Hypochlorite 0.05% = 16 Hypochlorite 1% = 12	Chlorhexidine/cetrimide = 2/126 Phenolic 1/34 Hypochlorite 0.05% 2/16 Hypochlorite 1% 0/12	Conventional methods	Pseudomonas maltophilia Pseudomonas spp. Achromobacter xylosoxidans Acinetobacter lwoffii Enterobacter cloacae Enterobacter spp. Acinetobacter calcoaceticus	Contamination when >=250 organisms/ml grow on any of both plates	Only >= 250 CFU/ml were considered contaminated	No data	Not applicable	Not applicable	Not investigated	Not investigated	Not applicable	Not applicable	Not applicable
Kaitwatcharachai	2000	2000s	Thailand	Southeastern Asia	Outbreak	Yes	UMIC	LMIC	An outbreak of Burkholderia cepacia bacteremia in hemodialysis patients: an epidemiologic and molecular study	Cetrimide-Chlorhexidine solution Povidone iodine Alcohol	3	CHG-QUAT	1/30 of 1.5% chlorhexidine-cetrimide 10% povidone iodine 70% alcohol Undiluted Renalin 21%	Aqueous and alcohol-based	Antiseptic and Disinfectant	3% Renalin = Dialyser machine disinfection 1/30 diluted solution of 1.5% chlorhexidine-cetrimide = disinfection of transfering forceps	Tertiary	Urban	Subclavian catheter	6 days	Yes	Deionized water Dialysate fluid Tap water Subclavian doublelumen catheters	Yes	Case-control	No investigation about colonization or carriage	Dialysis	Retrospective	Original	Not detailed	No data	No data	No data	No data	Positive	CHG-QUAT	1	1/1	Conventional microbiology and molecular tests (randomly amplified polymorphic DNA (RAPD))	Burkholderia cepacia	No data	10 Exp5 CFU/ml	No data	Not applicable	Not applicable	Genotype	Proven	The blood isolates PCRs were identical to those isolated from the diluted chlorhexidine-cetrimide; but different with the other environmental samples	Blood	Bacteremia
Parasakthi	2000	2000s	Malaysia	Southeastern Asia	Outbreak	Yes	UMIC	UMIC	Epidemiology and molecular characterization of nosocomially transmitted multidrug-resistant Klebsiella pneumoniae	Non antimicrobial soap	1	Plain soap	Not applicable	Aqueous	Hand hygiene	Handwashing	Tertiary	Urban	Leukemia	1 month	Yes	Rectal swabs Heparinized saline Sodium bicarbonate solution	No	No data	Patient colonization	Pediatric oncology	Retrospective	Original	Not detailed	No	Culture by either enrichment in broth prior to subculture or direct culture on standard culture media (The incubation temperature and time were not specified)	Enrichment Direct plating	No data	Positive	Liquid soap	4	2/4	Conventional microbiology and molecular tests (plasmid DNA and pulse field gel electrophoresis)	Klebsiella pneumoniae	No data	Not applicable	Disk diffusion	NCCLS1990, M100-S4	Sensitive to imipenem, ciprofloxacin Resistant to ampicillin, gentamicin, amikacin, trimethoprim-sulfamethoxazole, cefuroxime, cefotaxime, ceftriaxone, cefoperazone, and ceftazidime ESBL producers	Genotype	Proven	Molecular tests (plasmid analysis and PFGE)	Blood, wound and rectal swabs,	Bacteremia
Arjunwadkar	2001	2000s	India	Southern Asia	Cross-sectional	Yes	LMIC	LIC	Contaminated Antiseptics - An Unnecessary Hospital Hazard	Benzalkonium chloride	1	QUAT	Not specified	Aqueous	Antiseptic	Antisepsis of skin before urinary catheter insertion	Tertiary	Urban	Not applicable	Not applicable	Not applicable	Not applicable	Not applicable	Not applicable	Not applicable	4 wards of the hospital	Prospective	Original	1 ml was collected in a sterile container with all aseptic precautions	No	Plated on blood and MacConkey agar No more detail (incubation temperature, time)	Direct plating	No data	Positive	Antiseptics (no information)	Freshly prepared = 101 In-use antiseptics (5 days after praparation) = 183	Freshly prepared = 14.9% (15/101) In-use antiseptics (5 days after praparation) = 15.3 (28/183)	Standard techniques	Pseudomonas aeruginosa Klebsiella pneumoniae Non fermenters CNS	No data	Not applicable	Disk diffusion	guidelines not mentioned	Not reported (Only to compare the urine and antiseptic isolates)	Urinary colonization with the identical species	Suspected	The identical species presenting same AST profile were isolated from urine and antiseptic samples	Urine	Urinary colonization
Ogunsola	2002	2000s	Nigeria	Western Africa	Cross-sectional	Yes	LMIC	LIC	Contamination levels of in-use disinfectants in a teaching hospital in Lagos, Nigeria	Chlorhexidine Chlorhexidine/Cetrimide Sodium hypochlorite Hydrogen peroxide	4	CHG-QUAT QUAT H2O2 Chlorine	. Hibitane: 5% chlorhexidine gluconate . Hibiscrub: 4% chlorhexidine gluconate . Savlon: 3% chlorhexidine/cetrimide . 6% hydrogen peroxide . Bleach: 3% sodium hypochlorite	Aqueous	Disinfectant	No data	Tertiary	Urban	Not applicable	Not applicable	Not applicable	Not applicable	Not applicable	Not applicable	Not applicable	Pharmacy Pediatric Surgical Medical Obstetric Gynecological Modular theaters Ear Nose Throat and family planning clinics	Prospective	Original	1 ml of the liquid collected (no detail on how: surface or mixture of the liquid) Swabbing the inside surface of the containers	Yes, Tween 80	Dilution with nutrient broth (1 ml in 9 ml of diluent) + neutralizer (tween 80) Modified "in-use" test of Kelsey and Maurer Subculture of 5 drops onto nutrient agar 2 plates per sample (1 plate incubated at room temperature and the other in the incubator at 37°C) incubated for overnight When negative, further incubated for 72 h Subculturing onto blood agar and MacConkey and incubated at 37°C aero…	Modified In-use test of Kelsey and Maurer	Yes	Positive	Hibitane (CHG) (1/200, 1/250, 1/500, 1/1000 and 1/2000) Hibiscrub (CHG) Hygrogen peroxide Salvon (CHG-QUAT) Sodium hypochlorite (Chlorine)	Hibistane 1/200 = 5 Hibistane 1/250 = 5 Hibistane 1/500 = 5 Hibistane 1/1000 = 5 Hibistane 1/2000 = 5 Hibiscrub = 12 Hydrogen peroxide = 11 Salvon = 13 Sodium hypochlorite = 2	In-use = 82/130 (63.1%) Stock = 33/65 (50.8%)	Conventional microbiology	E. coli Proteus spp. Enterobacter spp. Bacillus spp. Staphylococcus spp. Klebsiella aerogenes	For =< 4 colonies/sample, the disinfectant was considered effective Up to 5 colonies/sample (500 CFU/ml), disinfectant implied adequate disinfection > 5 colonies/sample, the disinfectant is heavely contaminated	> 500 CFU/ml	Disk diffusion	NCCLS 1993	No data	Not investigated	Not investigated	Not applicable	Not applicable	Not applicable
Gajadhar	2003	2000s	Trinidad-and-Tobago	Latin America and the Caribbean	Cross-sectional	Yes	HIC	UMIC	Microbial contamination of disinfectants and antiseptics in four major hospitals in Trinidad	Chlorhexidine Chlorhexidine-Citrimonium bromide	2	CHG CHG-QUAT	Not specified	Aqueous	Antiseptic and disinfectant	No data	No data	Urban	Not applicable	Not applicable	Not applicable	Not applicable	Not applicable	Not applicable	Not applicable	Pharmacy department, Pediatric/neonatal ward, surgical ward	Prospective	Original	10 ml of eah product: in pharmacy stock and diluted(pre-use and in-use)	No data	Quantitative: dilution 1 ml od each sample in 9 ml of nutrient broth, 20 µl of the dilution inoculated on nutrient agar plate - 10 drops (method of Khor and Jegathesan) in duplicate plates, incubation at 25°C for 72 h (one plate) and 37°C for 24h (the other plate) Qualitative: new dilution 1/10 in nutrient broth in dulicate incubated at 25°C for 72 h (1 tube) and 37°C for 24 h (2nd tube) ; inocul…	In-use test of Kelsey and Maurer	Yes	Positive	CHG CHG-QUAT	180	11/180 (6%) . Chrlorhexidine + cetrimoniu bromide: 82% . Chlorhexidine gluconate:18%	No data	Pseudomonas aeruginosa	Diluton	3,62 104CFU/mL	Disk diffusion	guidelines not mentioned	Resistance: from 25% (tetracycline) to 100% (ceftriaxone and streptomycin	Not investigated	Not investigated	Not applicable	Not applicable	Not applicable
Nasser	2004	2000s	Lebanon	Western Asia	Outbreak	Yes	UMIC	UMIC	Outbreak of Burkholderia cepacia Bacteremia Traced to Contaminated Hospital Water Used for Dilution of an Alcohol Skin Antiseptic	Alcohol Povidone iodine	2	Alcohol Iodophor	Alcohol 70%	Aqueous	Antiseptic	Skin antisepsis	Tertiary	Urban	Prior antimicrobial therapy Presence of stopcock in intravenous setup Dextrose in water solution Heparin infusion Foley catheter More than 2 intravenous catheters Cancer	7 years	Yes	Water Catheter tips	Yes	case-control and cohort	No investigation about colonization or carriage	Hospital patients with sepsis	Retrospective	Original	Sample of diluted alcohol with tap water collected from 100 l plastic container used for alcohol dilution	No	Centrifugation of 100 ml of antiseptic samplesfor 30 minutes at 4000 rpm Discard the supernatant and add 10 ml of TSA to the pellet Iincubate at 37°C for 24 h, and plate on cetrimide agar, then incubate the agar at 37°C for 24 - 48 h	Centrifugation	No	Positive	Alcohol	No data	No data	Colony morphology Standard tests API 20 NE	Burkholderia cepacia	No data	Not applicable	Disk diffusion	NCCLS1993, M2-A5	Sensitive to fluoroquinolones, imipenem, piperacillin, piperacillin/tazobactam, ceftazidime, and cefepime Resistant to cephalothin, cefuroxime, cefoxitin, ampicillin, amoxicillin, amikacin, tobramycin, and gentamicin	Genotype	Proven	Restriction Fragment Length Polymorphism (PCR–RFLP) Analysis of B. cepacia 16S rDNA for the relatedness	Blood	Bacteremia
Danchaivijitr	2005	2000s	Thailand	Southeastern Asia	Cross-sectional	Yes	UMIC	LMIC	Microbial Contamination of Antiseptics and Disinfectants	Alcohol Chlorhexidine Sodium hypochlorite Povidone Iodine Tincture iodine Lysol	6	Alcohol CHG Chlorine Iodine	70% Alcohol 4% chlorhexidine 0,5% chlorhexidine 7,5% povidone iodine 10% povidone iodine 1-2% tinture iodine 2% lysol 0,5% sodium hypochlorite	Aqueous and alcohol-based	Antiseptic and Disinfectant	No data	Tertiary, Secondary and primary	Urban	Not applicable	Not applicable	Not applicable	Not applicable	Not applicable	Not applicable	Not applicable	Hospitals	Prospective	Original	Samples collected by stratified randomization immediately after preparation, the third, the fifth day and the seventh day No detail on the sampling techniques	No	Direct plating of 10 µl on blood agar and Plating of 10 µl on blood agar after dilution in tryptic soy broth (1 ml in 9 ml) Incubation temperature and time not specified	Modified In-use test of Kelsey and Maurer	No data	Positive	Alcohol 70% Chlorhexidine 4% Chlorhexidine 0.5% Povidone iodine 7.5% Lysol 2% Hypochlorite 0.5%	Alcohol 70% = 6562 Chlorhexidine 4% = 2722 Chlorhexidine 0.5% =1054 Povidone iodine 7.5% = 3648 Lysol 2% = 872 Hypochlorite 0.5% = 276	Average proportion of bacterial growth: In total sample = 1.8% of 16,142 samples Alcohol 70% = 2,3% Chlorhexidine 4% = 2,8% Chlorhexidine 0.5% = 2% Povidone iodine 7.5% = 0,5% Lysol 2% = 4,7% Hypochlorite 0.5% = 1%	Conventional methods	Pseudomonas aeruginosa Enterobacter spp. Acinetobacter spp. CNS Bacillus spp.	No data	Not applicable	No data	Not applicable	Not applicable	Not investigated	Not investigated	Not applicable	Not applicable	Not applicable
Subbannayya	2005	2000s	India	Southern Asia	Cross-sectional	Yes	LMIC	LIC	Can soaps act as fomites in hospitals?	Liquid soap Bar soap	2	Soap	Not applicable	Aqueous	Hand hygiene	Handwashing	Tertiary	Urban	Not applicable	Not applicable	Not applicable	Not applicable	Not applicable	Not applicable	Not applicable	Hospital	Prospective	Letters to the Editor	Bar soap disolved (no detail about the diluent) No detail on how liquid soap was collected	No	10 µl of disolved bar soap inoculated onto blood and MacConkey agar Dilution of 0.1 ml of liquid soap in 1 ml of nutrient broth and mixed; then 10 µl of diluted liquid soap inoculated onto blood and MacConkey agar Incubation at 37°C for 24 - 48 h	Modified In-use test of Kelsey and Maurer	No	Positive	Bar soap	12	Bar soap 100% (12/12)	Conventional methods	Pseudomonas aeruginosa Staphylococcus aureus	The 10 µl of liquid sample spead on the agar and the number of colony was counted after incubation	>10 exp5 CFU/ml	Not applicable	Not applicable	No data	Not investigated	Not investigated	Not applicable	Not applicable	Not applicable
Tytler	2006	2000s	Nigeria	Western Africa	Cross-sectional	Yes	LMIC	LIC	Microbial contamination of disinfectant solutions in some health care institutions of three towns in Northen Nigeria	Tiscol Germicide Savlon Tiscol Z-Germicide Purit Dettol Morigad Hibiscrub Harpic Eusol	10	Phenol CHG-QUAT CHG Chlorine	Not detailed	Aqueous	Disinfectant	No data	University, public and private hospitals	Urban	Not applicable	Not applicable	Not applicable	Not applicable	Not applicable	Not applicable	Not applicable	No data	Prospective	Original	40 ml of each stock and diluted solution were collected	No data	Nutrient agar, Nutrient broth, MacConkeyagar, MSA, Azide blood agar base, BHI, Methyl red VP and Koser citrate media and Peptone water For phenolic disinfectant: 1 ml of the undiluted disinfectant introduced into 20 ml of molten agar at 45°C, gently shaken to ensure distribution and plated out, allowed to solidifiy, and incubated inverted at 37°c for 24 h. For disinfectants containing chlorhexidi…	Pour plate count	No	Positive	Disinfectant (no info)	104	57.69%	Biochemical tests	Escherichia coli Pseudomonas aeruginosa Staphylococcus aureus Proteus spp. Bacillus subtilis	Pour plate methods (see culture methods) The means of the counts in two different plates of the same dilution was taken for each sample and the number of CFU/ml calculated	3.1x10 exp1 - 1.6x10 exp4 CFU/ml	No data	Not applicable	Not applicable	Not investigated	Not investigated	Not applicable	Not applicable	Not applicable
Afolabi	2007	2000s	Nigeria	Western Africa	Cross-sectional	Yes	LMIC	LIC	Bacterial contamination of commonly used soaps in three hospitals in Nigeria	Liquid soap Bar soap	2	Soap	Not applicable	Not applicable	Hand hygiene	Hand washing	Tertiary and Secondary	Urban	Not applicable	Not applicable	Not applicable	Not applicable	Not applicable	Not applicable	Not applicable	Hospital's wards, Neonatal units and theatres	Prospective	Original	Swabbing by rotating the swab sticks around all the exposed surface bar soaps or soap receptacles Liquid soap sampling techniques not described	No	Inoculation on MacConkey and blood agar Incubation at 37°C in aerobic and under CO2 condition for 24 - 48 h Biochemical tests for identification	Direct plating	No	Positive	Bar soap Liquid soap	36	Total 14/36 (38.9%) Bar soaps: 19/36 (53%) Liquid soaps: 1/7	Conventional methods	Pseudomonas aeruginosa Klebsiella pneumoniae Staphylococcus aureus Serratia marcescens	No data	Not applicable	Disk diffusion	guidelines not mentioned	Diffent AST results between soap isolates and wound isolates	No identical species isolated	No	Not applicable	Wound swabs	Not applicable
Espinosa de los Monteros	2008	2000s	Mexico	Latin America and the Caribbean	Outbreak	Yes	UMIC	UMIC	Outbreak of infection by extended-spectrum beta-lactamase SHV-5-producing Serratia marcescens in a Mexican hospital	Chlorhexidine	1	CHG	Not specified	Aqueous	Antiseptic	No data	Tertiary	Urban	No data	2 months	Yes	Healthcare workers Liquids	No	No data	Staff carriage Patient colonization	Pediatric surgery	Prospective	Original	Not detailed	No	McConkey Incubated at 37°C The incubation time not specified	Direct plating	No	Positive	CHG	Stock solution = 1 Diluted solution = 12	1/1 stock solution 2/12 diluted solution	Conventional microbiology Sequencing for the relatedness	Serratia marcescens	No data	Not applicable	Disk diffusion	CLSI 2005, M 100	Sensitive to amikacin, netilmicin and ceftriaxone Resistant to ampicillin, amoxicillin - clavulanic acid, cefoxitin, gentamicin, trimethoprim-sulfamethoxazol, tatracycline and chloramphenicol Clinical strains: ESBL	Genotype	Proven	Pulsed-field gel electrophoresis, plasmid profile and mating experiments, southern hybridation analysis, isoelectric focusing of beta-lactamase and bioassay, colony blot hybridation to detect blaTEM and blaSHV genes, TEM and SHV-specific PCR and DNA sequencing	Urine, catheter, blood, wound, lumen and cellulite	Bacteremia, wound infection and UTI
Zhang	2008	2000s	China	Eastern Asia	Cross-sectional	Yes	UMIC	LIC	Characterization of Bacillus amyloliquefacien contaminating 75% alcohol disinfectant	Alcohol	1	Alcohol	Alcohol 75% Alcohol 95%	Alcohol-based	Disinfectant	No data	Tertiary	Urban	Not applicable	Not applicable	Not applicable	Not applicable	Not applicable	Not applicable	Not applicable	Hospital	Prospective	Original	Not detailed	No	General nutrient agar Blood agar Enrichment in nutrient broth and identification with automate VITEK-32 Incubation time and temperture not specified	Enrichment	No	Positive	Alcohol	No data	No data	Gram-staining and biochemical tests (glucide fermentation) and Vitek-32	Bacillus amyloliquefacien	No data	> 800 CFU/ml	Disk diffusion	guidelines not mentioned	Sensitive to Ciproxacin, Cefoxitin, Piperacillin, Cefoperazine, Ceftazidime, Gentamycin, Amikacin, Ofloxacin, Ceftriaxone, Cefuroxime, Furantoin, Levofloxacin and Teicoplanin Resistant to Penicillin, Minocycline, Azithromycin, Erythrocin, Tetracycline, Sulfomine-co and Ampicillin	Not investigated	Not investigated	Not applicable	Not applicable	Not applicable
Ben Saida	2009	2000s	Tunisia	Northern Africa	Outbreak	Yes	LMIC	LMIC	A three-year surveillance of nosocomial infections by methicillin-resistant Staphylococcus haemolyticus in newborns reveals the disinfectant as a possible reservoir	CHG-QUAT	1	CHG-QUAT	Chlorhexidine 1% + QAC 0.2%	Aqueous	Disinfectant	No data	Tertiary	No data	No data	3 years	Not applicable	Not applicable	No	No data	Staff carriage	Neonates	Retrospective	Original	Sterile pipette to pick up 200 µl Sampling technique of cap not specified	No	Dilution of 200 µl of the disinfectant in 100 ml of brain heart infection and incubation at 37 °C for 48 - 72 h 100 µl of enriched sample subcultured on blood agar and incubated at 37 °C for 48 - 72 h Identification by colony morphology, Gram staining, catalase, coagulase and DNase Confirmation by molecular tests	Modified In-use test of Kelsey and Maurer	No	Positive	CHG-QUAT	12 opened 8 unopened	Opened bottles: 6/12 (50%) Unponed bottles: 4/8(50%)	Gram staining, Catalase, Dnase, and API 32 Staph Molecular tests (PFGE)	Staphylococcus haemolyticus Staphylococcus epidermidis Staphylococcus capitis Staphylococcus hominis Staphylococcus seprophyticus	No data	Not applicable	Disk diffusion, interpretation according to CASFM Test of meticillin resistance by using 5 µg of oxacillin disk and confirmation by PCR	CA-SFM, version not mentioned	Meticillin resistant Disinfectant isolate: Resistant to 14 antibiotics: oxacillin, penicillin, cotrimoxazol, fosfomicyn, gentamicin, kanamycin, ofloxacin, tobramycin, erythromycin, lincomycin, rifampicin, cefoxitin, tetracycline and nalidixic acid Clinical isolate: oxacillin, penicillin, cotrimoxazol, gentamicin, kanamycin, ofloxacin, tobramycin, erythromycin, lincomycin, rifampicin, cefoxitin, t…	Genotype	Proven	Molecular tests (But the AST results were different between clinical and disinfectant isolates (Although the genotype was same between clinical and disinfectant isolates, the AST profiles were different)	Blood, CSF, Catheter and tracheal tubes	Bacteremia
El-Mahmood	2009	2000s	Nigeria	Western Africa	Cross-sectional	Yes	LMIC	LMIC	Bacteriological examination of some diluted disinfectants routinely used in the Specialist Hospital Yola, Nigeria	Dettol (chloroxylenol) Purit (chlorhexidine) Parozone (sodium hypochlorite) Z-germicide (tar acid phenol) Septol (chloro-hydro-diphenyl methane)	5	Phenol CHG-QUAT Chlorine	Not specified	Aqueous	Disinfectant	No data	Tertiary	Urban	Not applicable	Not applicable	Not applicable	Not applicable	Not applicable	Not applicable	Not applicable	Operation theaters, patients' wards, accident/emergency units	Prospective	Original	50 ml of each diluted disinfectant collected and transported in ice-cooled packs to the lab	No	Dilution 1 ml of each sample in 9 ml of sterile tryptone soy broth, mixed on the vortex Subsequent dilution of 1 ml of the previous dilution in 9 ml of tryptone soy broth to obtain countable colonies 1 ml of the final dilution plated onto nutrient agar plates Incubated at 37 °C for 48 h	Modified In-use test of Kelsey and Maurer	No	Positive	Dettol (PCMX) Purit (CHG) Parazone (Chlorine) Z-germicide (Phenol) Septol (chloro-hydro-diphenyl methane)	20 samples of each disifectant	Purit = 30% (5/20) Dettol = 25% (6/20) Parazone = 20% (4/20) Z-germicide = 15% (3/20) Septol = 10% (2/20)	Standard procedures as described by Baker and Thornberg, 1983 (No more detail)	Escherichia coli Pseudomonas aeruginosa Proteus mirabilis Staphylococcus aureus	Pour plate method Dilution 1 ml in 9 ml of sterile tryptone soy broth A sub-sequent dilution of 1 ml of the previous diluted solution into 9 ml of sterile tryptone soy broth 1 ml of the final dilution plated onto nutrient agar plate Coloniy counter Mean of triplicate results taken as an average number of colonies, and was multiplied by the dilution factor	7.5x10 exp5 to 5.4x10 exp8 CFU/ml	Disk diffusion Dilution method for MIC and MBC determination of disinfectants	guidelines not mentioned	E. coli Sensitive to 4 antibiotics: chloramphenicol, gentamicin, streptomycin and tetracycline Resistant to 6 antibiotics S. aureus Sensitive to 5 antibiotics: nitrofurantoin, tetracyclin, gentamicin, ciprofloxacin and streptomycin Resistance to 6 antibiotics P. aeruginosa Sensitive to gentamycin, tetracycline, erythromycin, ampicilin, cotrimoxazole, chloramphenicol)	Not investigated	Not investigated	Not applicable	Not applicable	Not applicable
Muchina	2009	2000s	Kenya	Eastern Africa	Cross-sectional	Yes	LMIC	LIC	Transmitting infection: testing disinfectants used in maternity units	Sodium hypochlorite Biotex Lysol Presepts Cidex	5	Chlorine Glutaraldehyde	Not specified	Not specified	Disinfectant	No data	Primary, secondary and tertiary	Urban	Not applicable	Not applicable	Not applicable	Not applicable	Not applicable	Not applicable	Not applicable	Maternity	Prospective	Original	A 2 ml sterile syringe used to pick 1 ml of the disinfectant solution	No	Dilution 1 ml in 9 ml of peptone broth Place 0.02 ml drops of the diluted sample into ten different areas on each of 2 well-dried nutrient agar plates Incubation 1 plate at 37 °C et the other at room temperature (The incubation time nor specified) Failure to disinfect when growth in more than 5 drops on both or either plate	Modified In-use test of Kelsey and Maurer	Yes	Positive	Disinfectant (no info)	20	40% (8/20) Failure to "in-use" test	No data	Enteric bacilli Proteus species Pseudomonas species Haemolytic Staphylococcus Staphylococcus Fungi and filamentous Overgrowth of normal airborne contaminants such as micrococcus, aerobic spore bearing bacteria and filamentous fungi	No data	Not applicable	No data	Not applicable	Not applicable	No identical species isolated	No	Not applicable	Blood	Not applicable
Zeiny	2009	2000s	Iraq	Western Asia	Cross-sectional	Yes	UMIC	LMIC	Isolation of Some Microorganisms from Bar Soaps and Liquid Soaps in Hospital Environments	Liquid soap	1	Soap	Trace of formaldehyde in liquid soap as preservative rather than antimicrobial	Aqueous	Hand hygiene	Handwashing	Tertiary	Urban	Not applicable	Not applicable	Not applicable	Not applicable	Not applicable	Not applicable	Not applicable	Hospital wards and Surgery specialities	Prospective	Original	Bar soap collected by sawabbing its surface Liquid soap collected by swabbing of the container dispenser system (spout) Swabs dipped in 1 ml of normal saline, and transported in the lab	No	10 µl of each sample (swab in normal saline) directly plated on blood agar and EMB agar Incubation at 37°C for 22 - 24 h Sabouraud + chloramphenicol agar, and incubation at 30°C for 30 days for fungi	Direct plating	No	Positive	Bar soap Liquid soap	50 bar soaps 44 liquid soap container dispenser system	Bar soaps: 60% (30/50) Liquid soaps: 15,9% (7/44)	Conventional methods and API 20E, 20 and API Strep	Pseudomonas aeruginosa Escherichia coli Acinetobacter baumanii Proteus penneri Flavimonas oryzihabitans	No data	Not applicable	No data	Not applicable	Not applicable	Not investigated	Not investigated	Not applicable	Not applicable	Not applicable
Aktas	2010	2010s	Turkey	Western Asia	Cross-sectional	Yes	UMIC	UMIC	Extrinsic Contamination of Liquid Soap with Various Gram-Negative Bacteria in a Hospital in Turkey	Liquid soap Bar soap	2	Soap	Not applicable	Aqueous	Hand hygiene	No data	Tertiary	Urban	Not applicable	Not applicable	Not applicable	Not applicable	Not applicable	Not applicable	Not applicable	Opthalmology Private clinics Dermatology Pediatric Physical medicine and rehabilitation Obstetrics and gynecology Emergency department Gastroenterology Dialysis Cardiovascular surgery Nuclear medicine General surgery ICU Internal medicine Oncology Pulmonary diseases Psychiatry Plastic surgery Otorhinology	Prospective	Editorial	Not detailed	No	No data	No data	No data	Positive	Liquid soap	378	11.4% (44/378)	No data	P. aeruginosa Enterobacter aerogenes E. coli K. pneumoniae Enterobacter cloacae S. marcescens Klebsiella oxytoca	No data	Not applicable	No data	Not applicable	Not applicable	Not investigated	Not investigated	Not applicable	Not applicable	Not applicable
Caetano	2011	2010s	Brazil	Latin America and the Caribbean	Cross-sectional	Yes	UMIC	UMIC	Identification of bacterial contamination in liquid soap for hospital use	Liquid soap	1	Soap	Not specified	Aqueous	Hand hygiene	Hand washing	Secondary	Urban	Not applicable	Not applicable	Not applicable	Not applicable	Not applicable	Not applicable	Not applicable	Surgery, hematology, pediatrics, medical clinic, dermatology, Intensive Care Unit (ICU) and recovery room	Prospective	Original	All devices (soap dispensers) with liquid soap 12 ml of the liquid collected each time point: at the start of use, during use and at the end of use In case of contamination, the original container already in use was sampled, and if that was positive, the sealed (closed) container of the original soap from the same lot was sampled	No	Centrifugation and filtration on 0.22 µl filter for concentration Dilution (10-fold) for quantification Blood, Chocolate, Mac Conkey and Sabouraud agar used No detail on the incubation conditions	Centrifugation Filtration Dilution	No data	Positive	Liquid soap	59	Total: 33/59 (56%) Wall-mounted: 24 Original in-use: 7 Sealed: 2	Biochemical tests and semi-automated system Molecular tests for Mycobacterium	Burkholderia cepacia Pseudomonas putidas Pseudomonas aeruginosa Klebsiella pneumoniae Enterobacter cloacae Pseudomonas luteola	Dilution method (10-fold) for semi-quantification	1.2x10 Exp3 to 2.1x10 Exp6 CFU/ml	No data	Not applicable	Not applicable	Not investigated	Not investigated	Not applicable	Not applicable	Not applicable
Khanna	2013	2010s	India	Southern Asia	Outbreak	Yes	LMIC	LMIC	Serratia marcescens- a rare opportunistic nosocomial pathogen and measures to limit its spread in hospitalized patients	Liquid soap Disinfectant	2	Soap Disinfectant (not specified)	Not applicable	Aqueous	Hand hygiene Disinfection	Handwashing	Tertiary	Urban	Immunocompromised (1 with diabetes with hypertension with hemiparesis, 1 with meningitis, 2 with chronic myeloid leukaemia, and 1 from burn)	6 months	Yes	Walls Floors Corners Door handles Shelves sinks Ventilators Stethoscopes Other medical equipments	No	Cohort	Staff carriage Patient colonization	ICU	Retrospective	Original	Swabbing	No	Standard methods No more detail	No data	No data	Positive	Liquid soap	No data	No data	Biochemical tests	Serratia marcescens	No data	Not applicable	Dsik diffusion	CLSI 2000, M100 – S10	Sensitive to piperacillin/tazobactum, imipenem and ertapenem Resistant to aminoglycosides	Identical species	Suspected	Based on the biochemical tests result	Urines and pus	UTI and Wound infection
Deress	2014	2010s	Ethiopia	Eastern Africa	Cross-sectional	Yes	LIC	LIC	Isolation of Bacteria from Commonly Used Antiseptic and Disinfectant Solutions in Gondar University Hospital. North West Ethiopia	Alcohol Chlorine	2	Alcohol Chlorine	Alcohol 70% Savlon 2% Tincture iodine 2% H2O2 3% Bleach 0.05%	Aqueous and alcohol-based	Antiseptic and Disinfectant	No data	Tertiary	Urban	Not applicable	Not applicable	Not applicable	Not applicable	Not applicable	Not applicable	Not applicable	Inpatient department, ICU, and laboratory rooms	Prospective	Original	Mixing and collecting 10 ml of antiseptis and disinfectants twice in two weeks interval Transfered imediately in the lab	No	Dilution 1 in 9 ml of tryptone soy broth and incubated at 37°C for 24 h	Modified In-use test of Kelsey and Maurer	No	Positive	Alcohol Bleach (chlorine)	Alcohol = 25 Bleach = 21	Total: 3/86 (3.5%) 70% Alcohol: 1/25 (4%) 0.05% Bleach: 2/21 (9,25%)	Biohemical tests	Klebsiella pneumoniae Klebsiella ozaenae	No data	Not applicable	Disk diffusion	guidelines not mentioned	K. pneumoniae Sensitive to cirprofloxacin and nitrofurantoin Resistant to ampicillin, amoxicillin-clavulanic acid, chloramphenicol, and gentamicin Intermediate to trimethoprime-sulfamethoxazole K. ozaenae Sensitive to ampicillin, amoxicillin-clavulanic acid, chloramphenicol, trimethoprime-sulfamethoxazole gentamicin, cirprofloxacin and nitrofurantoin	Not investigated	Not investigated	Not applicable	Not applicable	Not applicable
Singh	2014	2010s	India	Southern Asia	Cross-sectional	Yes	LMIC	LMIC	In-use tests for detection of microbial contamination in hospital disinfectants and antiseptics	Intalon (Savlon) Betadine (Povidone iodine) Glutihyde (glutaraldehyde) Mega ciprit (Isopropyl alcohol) Sodium hypochlorite	5	CHG-QUAT Iodophor Glutaraldehyde Alcohol Chlorine	Glutaraldehyde: 2% Isopropyl alcohol: 70% (the remainders not specified)	Aqueous and alcohol-based	Antiseptic and Disinfectant	Materials' disinfection	No data	No data	Not applicable	Not applicable	Not applicable	Not applicable	Not applicable	Not applicable	Not applicable	Outpatient Indoor patient Operation theatres Blood bank	Prospective	Original	10 ml of eah product	Yes (Tween 80)	In-use test of Kelsey and Maurer Dilution 1 ml in 9 ml of nutrient broth with neutralizer 3% Tween 80 Inoculation of 20 µl of each of 10 drops on each of nutrient agar plates Incubation at 37°C for 3 days and room temperature for 7 days	In-use test of Kelsey and Maurer	Yes	Positive	Intalon (CHG-QUAT) Glutihyde (glutaraldehyde) Hypochlorite (chlorine)	Total 100 Intalon (67) Betadine (12) Glutihyde 2% (11) Mega ciprit (9) Sodium hypochlorite (1)	Intalon (3) Glutihyde (1) Hypochlorite (1)	Conventional methods	Pseudomonas aeruginosa	No data	No data	No data	Not applicable	No data	Not investigated	Not investigated	Not applicable	Not applicable	Not applicable
Akabueze	2015	2010s	Nigeria	Western Africa	Cross-sectional	Yes	LMIC	LMIC	Evaluation Of Disinfectants By The In-Use Technique In Healthcare Facilities In Kogi State North Central Nigeria	Purit Bleach Izal Spirit Dettol	5	CHG-QUAT Chlorine Phenol Alcohol	Purit (Chlorhexidine gluconate BP 2.4w/v, Cetrimide BP 3.0 w/v) Spirit (Isopropyl ethanol 70%) Bleach (Sodium hypochlorite 6%) Izal (Tar Phenol 7%) Dettol (Chloroxynol BPC 4.8% w/v)	Aqueous and alcohol-based	Disinfectant	Environmental cleaning	Secondary	Urban	Not applicable	Not applicable	Not applicable	Not applicable	Not applicable	Not applicable	Not applicable	20 hospitals	Prospective	Original	Transfer of 1 ml of disinfectant in 9 milliliters of broth	Yes, sodium thiosulfate 0.5%	Dilution 1 ml in 9 ml of quarter-strength Ringers' solution + neutralizer (nutrient broth containing 0.5% sodium thiosulphate to inactivate chlorine and iodophors) Placing 10 drops (50 µl each drop) onto each of 2 agar plates; incubate 1 plate at 37°C and the other at room temperature for 72 h Growth from more than 5 of 10 drops considered failure of disinfection	In-use test of Kelsey and Maurer	Yes	Positive	Purit (CHG) Bleach (chlorine) Izal (phenol) Dettol (chloroxynol) Spirit (isopropyl alcohol)	Purit = 20 Bleach = 20 Phenol = 20 Dettol = 12 Spirit = 20	Purit (chlorhexidine) In-use for 1-7, 8-14, and >15 days: 5/20 (20%), 5/8 (62%) and 85% of failure, respectively Bleach (sodium hypochlorite) In-use for 1-7, 8-14, and >15 days: 2/6 (33.3%), 4/9 (44.4%), and 4/5 (80%) of failure, respectively Izal (phenol) In-use for 1-7, 8-14, and >15 days: 1/4 (25.0%), 4/8 (50.0%), and 6/8 (75.0%) of failure, respectively Dettol (chloroxynol) In-use for 1-7, 8-…	Conventional methods	P. aeruginosa Proteus spp. CNS S. aureus	Growth in ≥ 5 drops considered failed to disinfect, and colony count assumed ≥ 1000	≥1000 CFU/ml	No data	Not applicable	Not applicable	Not investigated	Not investigated	Not applicable	Not applicable	Not applicable
Biswal	2015	2010s	India	Southern Asia	Cross-sectional	Yes	LMIC	LMIC	Increase in hospital purchase of hand hygiene products: The importance of focusing on the right product	Liquid soap Bar soap	2	Soap	Not applicable	Aqueous	Hand hygiene	Handwashing	Tertiary	Urban	Not applicable	Not applicable	Not applicable	Not applicable	Not applicable	Not applicable	Not applicable	Hospital critical care areas	Prospective	Original	Swabbing the surface of bar soaps and receptacle 1 ml of in-use liquid soap poured in a sterile screw capped tube; and when bacterial growth in in-use soap sample, 1 ml from unopened container was collected	Yes (Type not specified)	Use of neutralizer 100 µl inoculated directly onto agar plates 200 µl added to 1 ml of Sabouraud's Dextrose broth and thioglycolate broth each Blood agar, MacConkey and Sabouraud dextrose Incubation for 48 h at 37°C	Modified In-use test of Kelsey and Maurer	No	Positive	Bar soap Liquid soap	Bar soap = 99 In-use Liquid soap = 60	Bar soap 61.6% (61/99) In-use Liquid soap 3.3% (2/60)	MALD-ITOF	Pseudomonas mendocina Pseudomonas aeruginosa Acinetobacter haemolticus Klebsiella pnsumoniae Citrobacter spp. Acinetobacter spp. Halomonas aquamarina Arthrobacter spp. Vibrio shiloi E. coli MRSA Bacillus	No data	Not applicable	No data	Not applicable	Not applicable	Not investigated	Not investigated	Not applicable	Not applicable	Not applicable
Stoesser	2015	2010s	Nepal	Southern Asia	Outbreak	Yes	LMIC	LIC	Dynamics of MDR Enterobacter cloacae outbreaks in a neonatal unit in Nepal: insights using wider sampling frames and next-generation sequencing	Liquid soap	1	Soap	Not specified	Aqueous	Hand hygiene	Handwashing	Secondary	Urban	No data	No data	No data	No data	Yes	No data	No investigation about colonization or carriage	Neonatology	Retrospective	Original	Swab collected from insite soap container	No	Standard protocols No more detail	No data	No data	Positive	Liquid soap	1	No data	Biochemical profiling and WGS	Enterobacter cloacae	No data	Not applicable	Disk diffusion and Phoenix	NCCLS2001, M02 – A11 and EUCAST2013, version 3.0	13 patient's isolates were blaNDM-1 positive No the soap isolate	Genotype	Proven	Whole genome sequencing of DNA	Blood	Bacteremia
Ahmad	2016	2010s	Palestinia	Western Asia	Cross-sectional	Yes	LMIC	LMIC	Microbiological Quality of Soaps and Efficacy of Antiseptics and Disinfectants Used in Hospitals in Gaza - Palestine (Master thesis)	Liquid soap	1	Soap	Not applicable	Aqueous	Hand hygiene	No data	Tertiary	Urban	Not applicable	Not applicable	Not applicable	Not applicable	Not applicable	Not applicable	Not applicable	Hospitals	Prospective	Original	50 - 100 ml of each product were transferred aseptically in a sterile cup, transported to the lab in ice bow within 2-4 h	No	Decimal dilution (10 exp2, 10 exp3, 10 exp4 …) of liquid soap (10 ml in 90 ml of diluents) Shaken and 100 µl spreaded onto nutrient agar Plate count, MacConkey, Baird Parker, violet red bile, Dichloran Medium Base with Rose Bengal, Cetrimide Agar, and Mannitol Egg Yolk Polymyxin Agar were also used Incubated at 37°C for 24-48 h Microbiological efficacy of antiseptics and disinfectants on three mi…	Dilution	No	Positive	Liquid soap	105	32/105 (30.5%)	API 20 E Catalase test Coagulase test Gram-staining Oxidase test Potassium iodide Sodium thiosulfate Starch solution	Pseudomonas aeruginosa E. coli S. aureus	Decimal dilution and use of Plate count agar	No data	No data	Not applicable	Not applicable	Not investigated	Not investigated	Not applicable	Not applicable	Not applicable
Altaher	2016	2010s	Palestine	Western Asia	Cross-sectional	Yes	LMIC	LMIC	Comparative Identification of Bacterial Quality in liquid Soap between Nasser and European Gaza Hospitals, Khanyounis Governorate	Liquid soap	1	Soap	Not specified	Aqueous	Hand hygiene	No data	Secondary	Urban	Not applicable	Not applicable	Not applicable	Not applicable	Not applicable	Not applicable	Not applicable	Care units, stations, staff rooms, working rooms, toilets and kitchens	Prospective	Original	Liquid soap was collected in 100 ml sterile cups and transported within 1 h in the lab No detail on the sampling techniques and the volume collected	No	Dilution 1 ml of soap in 9 ml of normal saline (1/10) 10 µl of the diluted sample plated on blood and MacConkey agar For bacterial growth with catalase positive colonies on blood agar: the 1/10 diluted sample was plated on MSA for Staphylococcus isolation	Modified In-use test of Kelsey and Maurer	No	Positive	Liquid soap	82 (41 in each hospital)	Nasser hospital: 2.4% (1/41) with Staphycoccus aureus and 4.8 (2/41) with other staphycoccus European Gaza Hospital: 29.3% (12/41) with Staphylococcus aureus and 31.7% (13/41) with other Staphylococcus	Catalase, MSA, Coagulase	Staphylococcus aureus other Staphyloccus	Dilution	5 - 400 CFU/ml	No data	Not applicable	Not applicable	Not investigated	Not investigated	Not applicable	Not applicable	Not applicable
Valderrama-Beltrán	2019	2010s	Colombia	Latin America and the Caribbean	Pseudo-Outbreak	Yes	UMIC	UMIC	Pseudobrote por Burkholderia cepacia en dos unidades de cuidados intensivos de un Hospital Universitario en Bogotá – Colombia (Language: Spanish) Pseudo-Outbreak of Burkholderia cepacia in two intensive care unit in a University Hospital in Bogotá - Colombia	Chlorhexidine soap Cetrimide Alcohol Soap	4	CHG QUAT Alcohol Soap	Chlorhexidine soap = 2% and Chlorhexidine+alcohol solution = 4% No detail on the concentration of the others products	Aqueous and alcohol-based	Antiseptic, disinfectant and hand hygiene	Skin cleaning with a sachet of 4% chlorhexidine soap Subsequent skin antisepsis of 2% chlorhexidine+alcohol solution plus	Tertiary	Urban	Subclavian central venous catheter	2 weeks	Yes	Surfaces: bed rails, ventilators, ultrasound scanners, infusion pumps, sinks, doors, windows, medication carts and nursing stations	Yes	No data	No investigation about colonization or carriage	ICU	Retrospective	Original	Not detailed	No	No data	No data	No data	Positive	Chlorhexidine	No data	1 lot	Automate Microscan and molecular test (genotyping, Repetitive element sequence-based)	Burkholderia cepacia	No data	Not applicable	Molecular tests	Not applicable	VIM Carbapenemase procducing strain Ceftazidase	Genotype	Proven	Rep-PCR genotyping	Blood	Pseudo-bacteremia
Clara	2021	2020s	Argentina	Latin America and the Caribbean	Outbreak	Yes	UMIC	LMIC	Report of two events of nosocomial outbreak and pseudo-outbreak due to contamination with Achromobacter spp.	Chlorhexidine soap	1	CHG	4%	Aqueous	Antiseptic	Skin antisepsis	Tertiary	Urban	Emergency, Immunocompromised patients, Organe and bone marrow transplantation, tumor surgery, diabetes, hepatic failure, peripheral cardiovascular disease, neurological disease, chronic respiratory disease, orthopedic an traumatology, internal medicine, critical units, surgery	3 years	Yes	Heparin tubes EDTA tubes Sodium citrate tubes	Yes	Case report	Infection (28%) and colonization (72%)	Emergency wards Hematology - oncology Surgery Internal medicine	Retrospective	Original	Investigation of the source of contamination Sample selection not described	No	Dilution Enrichment	Dilution Enrichment	No data	Positive	Chlorhexidine soap (medicated soap)	17	15/17	nrdA sequencing Multilocus sequence-typing (MLST) PFGE	Achromobacter xylosoxidans Achromobacter spp.	No data	Not applicable	No data	Not applicable	Not applicable	Genotype	Proven	The epideminc and contaminating bacteria belonged the same serogroup	Blood Other clinical sammples	Bacteremia Pseudo-bacteremia
Firesbhat	2021	2020s	Ethiopia	Eastern Africa	Cross-sectional	Yes	LIC	LIC	Bacterial profile of high-touch surfaces, leftover drugs and antiseptics together with their antimicrobial susceptibility patterns at University of Gondar Comprehensive Specialized Hospital, Northwest Ethiopia	Ethanol	1	Alcohol	80%	Alcohol-based	Antiseptic Hand hygiene	HH Disinfection	Tertiary	Urban	Not applicable	Not applicable	Not applicable	Not applicable	Not applicable	Not applicable	Not applicable	Surgical wards Post-natal Orthopedic Trauma NICU	Prospective	Original	25 ml of alcohol or swabbing of leftover alcohol	No data	Pre-incubation in broth at 37°C for 24 h, Centrifugation (3000 rpm for 3 min.) and subculture of the sediment on blood, MacConkey, Chocolate agar and MSA, incubation at 37°C for 24 - 48 h	Enrichment	No	Positive	Alcohol ABHR	40	10% (4/40)	Conventional microbiology	A. baumannii CNS Bacillus spp.	No data	No data	Disk diffusion	CLSI 2021	AB selected: ciprofloxacin (5 μg), gentamicin (10 μg), tetracycline (30 μg), cotrimoxazole (25 μg), ceftazidime (30 μg), vancomycin (30 μg), piperacillin (100 μg), imipenem (10 μg), meropenem (30 μg), cefuroxime (30 μg), amikacin (30 μg), cefepime (30 μg), augmentin (30 μg), ampicillin (10 μg), penicillin (10 IU), erythromycin (15 μg), cefoxitin (30 μg), doxycycline (30 μg), and clindamycin (2 μg…	Not applicable	Not applicable	Not applicable	Not applicable	Not applicable
Said 2022	2022	2020s	South Africa	Southern Africa	Outbreak	Yes	UMIC	UMIC	Outbreak and control of Achromobacter denitrificans at an academic hospital in Pretoria, South Africa	Chlorhexidine	1	CHG	0.05%	Aqueous	Antiseptic	Skin/mucous antisepsis	Tertiary	Urban	Immunocompromised Malignancy Patients with indwelling urinary and intravascular catheters Patients with hemodialysis and peritoneal dialysis	44 weeks	Yes	Sterile water used to dilute CHG Table-top surface in the praparation in the pharmacy Bromothymol blue added to the diluted CHG	No	No	No	Hematology - Oncology Surgery and related wards Dialysis Intensive care unit Obstetric and gynecology Internal medicine Pediatrics	Retrospective and prospective	Original	Swabbing	No	Blood agar MacConkey agar Incubation at 35-37°C for 48 h	Direct plating	No	Positive	CHG	No data	No data	Vitek 2 (Commercial)	Achromobacter denitrificans	No data	Not applicable	Disk diffusion CLSI 2018 M-100	CLSI 2018 M-100	Resistant to aztreonam and aminoglycosides Sensitive to antipseudomonal agents: piperacillin-tazobactam, ceftazidime, cefepime, imipenem, meropenem, fluoroquinolones	AST Genotype	Proven	Repetitive-element, sequence-based PCR (rep-PCR)	Blood CSF Bone marow Fluid aspirate Peritoneal fluid Pus swab Tissue Tracheal aspirate Urine	Bacteremia Abcess or wound infection Meningitis Osteomyelitis Otitis media Arthritis Hematology malignancy Benign tumors Peritonitis related to dialysis
Keah	1995a	1990s	Malaysia	Southeastern Asia	Cross-sectional	Yes	UMIC	UMIC	Bacterial Contamination of Hospital Disinfectants	Alcohols Phenols QUAT Chlorhexidine Hypochlorite Povidone-iodine	6	Alcohol Phenol QUAT CHG Chlorine Iodophor	Alcohol 70% Amphyl 1/50, 1/100 and 1/200 Carbolic acid 1/20 Cetrimide 1/50 and 1/100 Chlorhexidine (in 70% alcohol) 1/200 and 1/2000 Chlorhexidine (aqueous) 1/20, 1/200, 1/1000, 1/2000 and 1/5000 Chlorhexidine (with 1% NaNO2) 1/2000 and 1/5000 Dettol 1/20 and 1/40 Hypochlorite 1/10 Lysol undiluted 1/20 and 1/40 Cidex 2%	Aqueous and alcohol-based	Disinfectant	Desinfecting spillage Predesinfection cleaning Storage of thermometers in disinfectant Disinfection as a substitute for sterilization of autoclavable items Fogging of environment with disinfectant	General hospitals	No data	Not applicable	Not applicable	Not applicable	Not applicable	Not applicable	Not applicable	Not applicable	Hospital wards, operation theatres, Pharmacy and laboratory	Prospective	Original	Random selection of 5% of freshly diluted disinfectants collected from each batch in the pharmacy The 10th, 30th, 50th, 70th and 90th bottle from a batch of every 100 were selected for testing 2 ml samples from the selected bottles were collected in sterile universal containers using a sterile pipette prior to distribution to the wards Disinfectants from the selected bottles were again sampled si…	Yes, Tween 80	Modified in-use test of Kelsey and Maurer Dilution with nutrient broth + tween 80 (1 ml in 9 ml) Ten drops of diluted disinfectant dropped onto 2 nutrient agar plates incubated (1 plate at room temperature and the other in incubator 37°C) for 48 hours A growth of >= 250 CFU/ml indicated a failure of the disinfection process or contamination of disinfectant	Modified In-use test of Kelsey and Maurer	Yes	Positive	Alcohol 70% Amphyl (ethanol) 1/100 and 1/200 Carbolic acid (phenol) 1/20 Cetrimide 1/50 and 1/100 Chlorhexidine (in 70% alcohol) 1/200 Chlorhexidine (aqueous) 1/200, 1/1000, 1/2000 and 1/5000 Chlorhexidine (with 1% NaNO2) 1/5000 Dettol 1/20 and 1/40 Hypochlorite 1/10 Lysol undiluted 1/20 and 1/40	Alcohol 70% = 170 in pharmacy, 103 in ward Amphyl 1/100 = 1 (in pharmacy and in ward) Amphyl 1/200 =380 in pharmacy and 149 in ward Carbolic acid 1/20 = 129 in pharmacy and 97 in ward Cetrimide 1/50 = 59 in pharmacy and 31 in ward Cetrimide 1/100 = 501 in pharmacy and 324 in ward Chlorhexidine (in 70% alcohol) 1/200 = 979 in pharmacy and 543 in ward Chlorhexidine (aqueous) 1/200 = 250 in pharmacy…	From the pharmacy (freshly diluted): 7.9% (342/4316) In the wards (freshly diluted and in-use): 16.1% (367/2278) and 16.4% (1519/9265) (Highest proportions in freshly prepared with chlorhexidine aqueous 1/5000 58.1% (18/31) in pharmacy and 53.3% (8/15) in ward) (Highest proportions in in-use product with chlorhexidine aqueous	Conventional methods, API or Mirobat	Enterobacter spp. Pseudomonas spp. Acinetobacter spp. Alcaligenes spp. Flavobacterium spp. Moraxella spp	Indication of contamination: >=250 organisms/ml	Only >= 250 CFU/ml were considered contaminated	No data	Not applicable	No data	Not investigated	Not investigated	Not applicable	Not applicable	Not applicable
[truncated: 13 more columns]
